# Supplementary material
Source: PubMed Central journal article supplement (PMC4169994)
Supplement: NIHMS603019-supplement-Supplementary_Methods.pdf [file NIHMS603019-supplement-Supplementary_Methods.pdf]

## SUPPLEMENTAL METHODS:

### SEGMENTATION:

Receptor:

- Granular segmentation
- Kernel = 3
- Sensitivity = 50

Arrestin:

- Granular segmentation
- Kernel = 3
- Sensitivity = 50

Nucleus segmentation algorithm:

- Nuclear segmentation algorithm
- 100% sensitivity

Colocalized Receptor and Arrestin:

Step 1, Preprocessing:

- Run Macro (Combine Min)
- Input channels 6 & 7
- Output channel 8

Step 2, Intensity-based Segmentation

- Minimum threshold = 1
- Maximum threshold = 4095

This assured that only pixels that represented both receptor and arrestin were colocalized with one another.

ComboCellBody segmentation algorithm:

Input: YFP-Receptor, channel 1

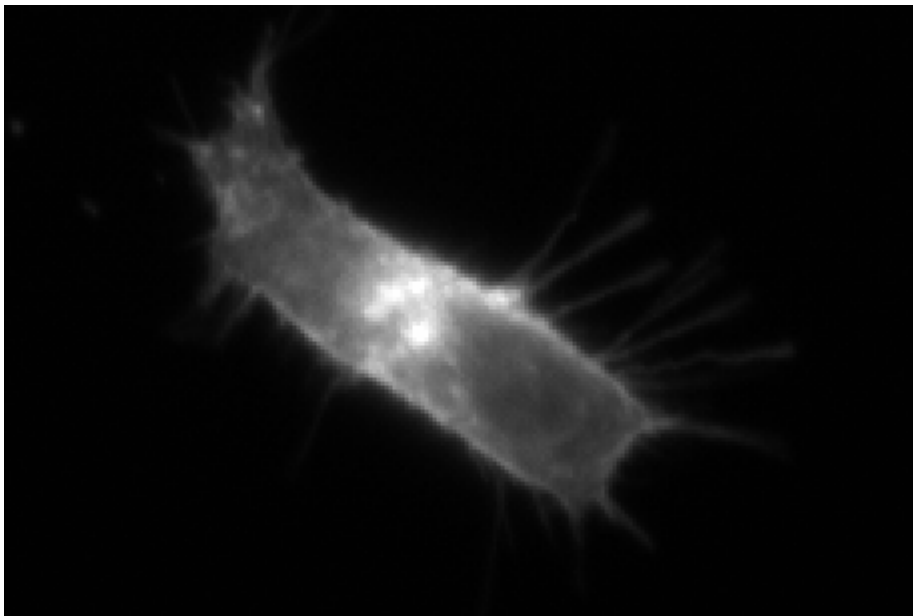

## Step 1: Preprocess Macro

### Information Equalization

Output to Ch 9 for temporary storage

(to ensure normalized intensity values from one transfection to another)

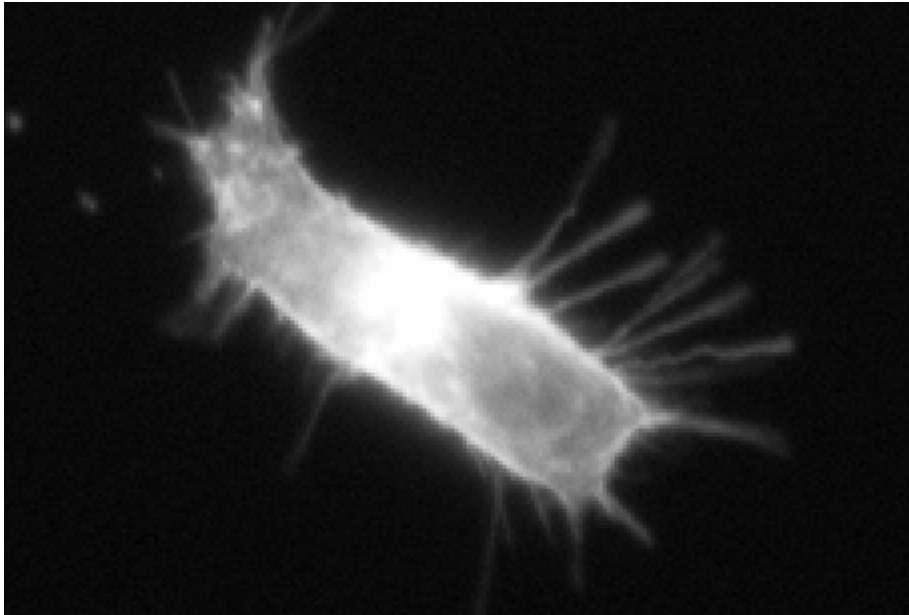

## Step 2:

### Texture Transformation

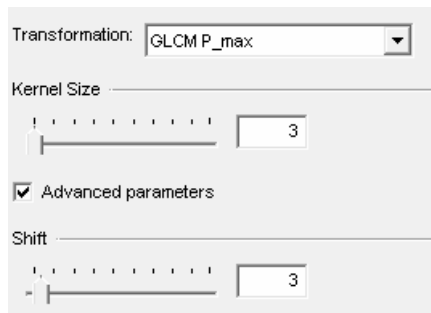

This was done to achieve homogeneity of cytoplasmic areas that was significantly disrupted upon granularization of the YFP-tagged receptor as it internalized over time. Gray level co-occurrence matrices (GLCM) are a calculation of occurrences of a particular gray value within a designated space. That is, by calculating the number of pixels with similar gray levels within a certain radius (kernel), we are able to generate another image (x by y matrix) of the gray level occurrences for every individual pixel. This results in an image with a smoothed intracellular texture, easing contiguous cytoplasmic segmentation.

These pixels that represent the cytoplasmic intensity can be emphasized by the fact they are more abundant than the bright puncta that form upon receptor internalization, and the bright puncta are de-emphasized via a relatively smaller abundance within the 3 pixel window used in this step.

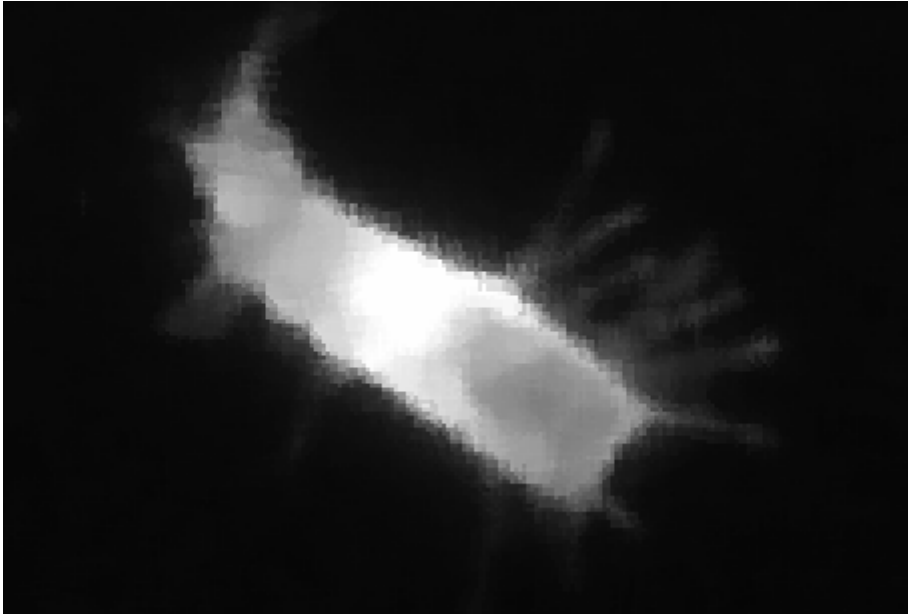

Step 3:

Segmentation

Intensity

Minimum threshold at 40 gray level (determined empirically, based on output of GLCM P\_max smoothing)

Maximum threshold at 4095

Filled

Use acceptance criteria

[Area] > 100  $\mu\text{m}^2$

Update Output Image (channel 5)

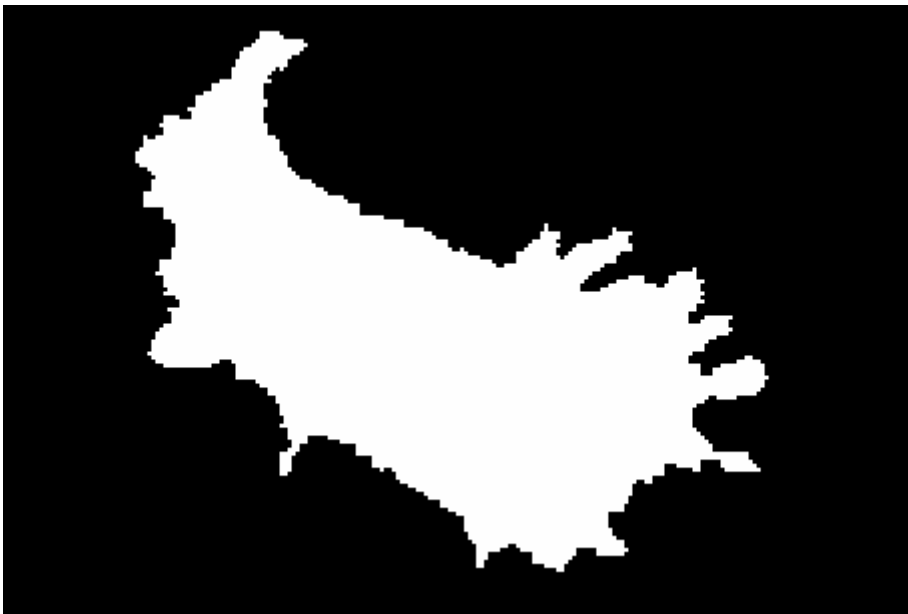

Step 4:

Postprocessing

Sieve (Binary)

Keep  $\geq 100 \mu\text{m}^2$

Border Object Removal

All borders

Sieve (Binary)

Keep  $> 100 \mu\text{m}^2$

Clump Breaking

Second segmentation: nucleus

Don't include secondary targets

Perinuclear segmentation:

Identical settings as the nuclear area.

(this was programmed separately to allow for modification of the perinuclear mask [e.g. dilation to increase the size of the perinuclear mask] without affecting nuclear area, a useful measure of apoptosis).

**TARGET LINKAGES:** Targets were linked to each other in order that receptor and arrestin puncta could be associated to individual cells and to subcellular regions (perinuclear). This was achieved via multiple target linkages, each ultimately assigning every individual target of interest to the primary target set of ComboCellBody, which allows for every measure to be analyzed on a cell by cell basis.

Primary Total cell Linkages:

| Primary       | Secondary       | Title              |
|---------------|-----------------|--------------------|
| ComboCellBody | Receptors       | Receptors in Cells |
|               | Arrestin        | Arrestin In Cells  |
|               | Colocalizations | Coloc In Cells     |

Primary Subcellular Linkages:

| Primary     | Secondary       | Title             |
|-------------|-----------------|-------------------|
| Perinuclear | Receptors       | Receptors in Peri |
|             | Arrestin        | Arrestin in Peri  |
|             | Colocalizations | Coloc in Peri     |

Primary Subcellular Region Linkages:

| Primary       | Secondary   | Title         |
|---------------|-------------|---------------|
| ComboCellBody | Perinuclear | CellBody-Peri |

(created in the order that objects were assigned to a subcellular region and were assigned to the correct cell)

Second-Level Linkages (Composed One to One):

| Title                    | Primary       | Secondary         | Matching Path               |
|--------------------------|---------------|-------------------|-----------------------------|
| Linked Receptors in Peri | CellBody-Peri | Receptors in Peri | (ComboCellBody\Perinuclear) |
| Linked Arrestin in Peri  | CellBody-Peri | Arrestin in Peri  | (ComboCellBody\Perinuclear) |
| Linked Coloc in Peri     | CellBody-Peri | Coloc in Peri     | (ComboCellBody\Perinuclear) |

This linkage results in the effective organization of targets in the hierarchy outlined in Table S1, with every measure referred up the hierarchy to report within ComboCellBody.

**MEASURES:** For each linkage corresponding to a particular object (in this case representing an individual cell), two measures were generated, Area and Count (totals per cell or subcellular area). Other useful measures were calculated on every cell, including:

Position

- X location
- Y location
- Distance moved from prior location
- Polar angle of movement

Morphometric:

- Form Factor
- Area
- Length
- Major Axis length
- Minor Axis Length

Intensity:

- YFP intensity (raw)
- YFP intensity (post-normalization/information equalization)
- dsRed intensity

Identification:

- Label
- Linked Track ID
- Tracking Events

**CELL TRACKING:** ComboCellBody objects were tracked using Developer's built-in Cell Tracking proximity algorithm with the following parameters:

|                    |   |
|--------------------|---|
| Relative threshold | 1 |
| Outlier detection  | 2 |

Only Pos X and Pos Y were used, each with an equal weight of 1.0.

**EXCEL TEXT-BASED EXTRACTION:** Well, field, and time information were encoded in a singular text string “Section” located in the first column “A” and were extracted using the LEFT(), VALUE(), SUBSTITUTE(), and MID() formulas below:

Example [Section]: B - 1 (fld 1 - 510000)

1. [Well] = LEFT(A2,5)
2. [Field] = VALUE(MID(A2,12,1))
3. [Time (min)] = VALUE(SUBSTITUTE((MID(A2,16,10)),")",""))/60000
  - a. Time is reported in Section as milliseconds
  - b. SUBSTITUTE is used to replace the end parenthesis “)” returned in MID formula applied to shorter timepoints with a blank space to avoid errors in the VALUE function, which converts text to numerical format. E.g. “0)”→”0”
