# Supplementary material
Source: PubMed Central journal article supplement (PMC4169994)
Supplement: NIHMS603019-supplement-Table_S2.pdf [file NIHMS603019-supplement-Table_S2.pdf]

| <u>Primary Object</u> | <u>Secondary Objects</u>         | <u>Measures Calculated &amp; Reported</u>                                                                                                                                                                               |
|-----------------------|----------------------------------|-------------------------------------------------------------------------------------------------------------------------------------------------------------------------------------------------------------------------|
| ComboCellBody         | (within ComboCellBody itself)    | Area<br>Form Factor<br>X position<br>Y position<br>Major axis length<br>Minor axis length<br>Mean YFP Intensity<br>Mean YFP Intensity (Normalized)<br>Mean dsRed Intensity<br>Label<br>LinkedTrackID<br>Tracking Events |
|                       | Receptors in Cells (Total)       | Count<br>Area (Total per cell)<br>Area (Mean)                                                                                                                                                                           |
|                       | Arrestin in Cells (Total)        | Count<br>Area (Total per cell)<br>Area (Mean)                                                                                                                                                                           |
|                       | Colocalizations in Cells (Total) | Count<br>Area (Total per cell)<br>Area (Mean)                                                                                                                                                                           |
|                       | Nuclei                           | Area<br>Nuclear / Cell Area                                                                                                                                                                                             |
